# Supplementary material for: A facile and efficient method for rapid detection of trace nitroaromatics in aqueous solution
Source: Royal Society of Chemistry journal article supplement (doi:10.1039/b802655f), 2008-01-01
Supplement: b802655f.pdf [file b802655f.pdf]

## Supplementary Information

### A Facile and Efficient Method for Rapid Detection of Trace Nitroaromatics in Aqueous Solution

Shengyang Tao, Yan Li, and Guangtao Li\*

Key Lab of Optoelectronic and Molecular Engineering, Department of Chemistry, Tsinghua University

Beijing, China. E-mail: LGT@mail.tsinghua.edu.cn

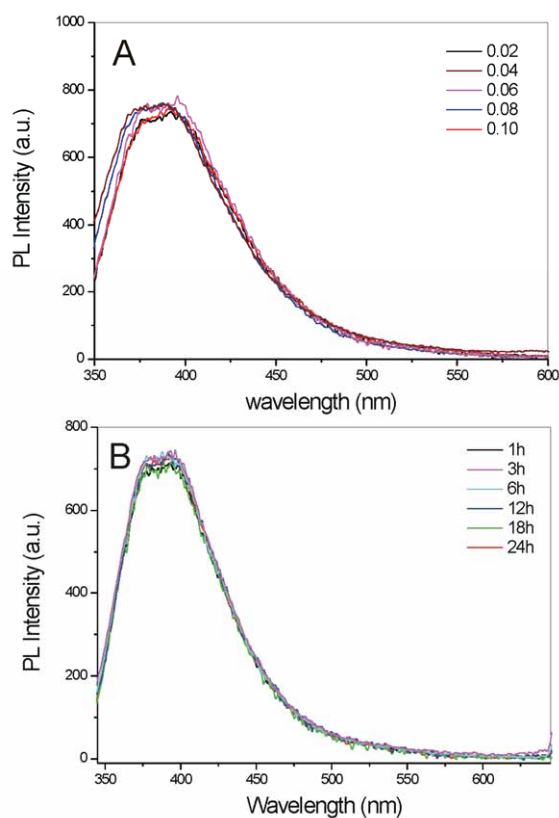

**Figure S1** (A) Photoluminescence spectra of ZnO-doped mesoporous films prepared under different  $\text{Zn}(\text{OAc})_2$  concentrations from 0.02M to 0.10M; (B) PL spectra of ZnO-doped mesoporous films prepared under different soaking time from 1h to 24h. The excitation wavelength is 325 nm.

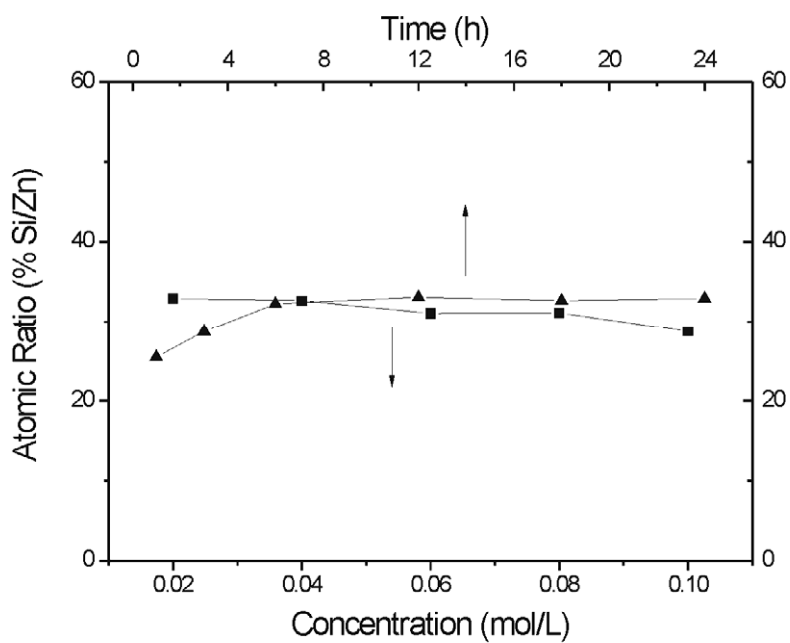

**Figure S2** Atomic ratios of Si to Zn under different preparation conditions. (■) Different concentration of Zn (OAc)<sub>2</sub> solution from 0.02M to 0.10M with the same soaking time (12h); (▲) different soaking time from 1h to 24h with the same concentration of Zn(OAc)<sub>2</sub> solution (0.02M).
